# Supplementary material for: In vitro activity of antimicrobial peptide CDP-B11 alone and in combination with colistin against colistin-resistant and multidrug-resistant Escherichia coli
Source: PubMed Central journal article supplement (PMC7835343; doi:10.1038/s41598-021-81140-8), 2021-01-25
Supplement: 41598_2021_81140_MOESM1_ESM.pdf [file 41598_2021_81140_MOESM1_ESM.pdf]

## **Supplemental Table 1**

In vitro activity of antimicrobial peptide CDP-B11 alone and in combination with colistin against colistin-resistant and multidrug-resistant *Escherichia coli*

Kaitlin S. Witherell

Jason Price

Ashok D. Bandaranayake

James Olson

Douglas R. Call

**Supplementary Table 1A:** Average colony forming units (CFU) present at each hour for colistin only or 50 µg/ml CDP-B11 plus colistin in Mueller-Hinton.

| µg/ml | Colistin only |      |      |      |      | 50 µg/ml CDP-B11 plus colistin |        |      |      |      |
|-------|---------------|------|------|------|------|--------------------------------|--------|------|------|------|
|       | 0             | 1.25 | 2.5  | 5    | 10   | 0                              | 1.25   | 2.5  | 5    | 10   |
| 0     | >100          | >100 | >100 | >100 | >100 | >100                           | >100   | >100 | >100 | >100 |
| 1     | >100          | >100 | >100 | 0    | 0    | >100                           | >100   | >100 | <1   | 0    |
| 2     | >100          | >100 | 5.3  | 0    | 0    | >100                           | >100   | 2.3  | 0    | 0    |
| 3     | >100          | >100 | 0    | 0    | 0    | >100                           | >100   | 0    | 0    | 0    |
| 4     | >100          | >100 | <1   | 0    | 0    | >100                           | >100   | <1   | 0    | 0    |
| 5     | >100          | >100 | 0    | 0    | 0    | >100                           | >100   | 0    | 0    | 0    |
| 6     | >100          | >100 | 0    | 0    | 0    | >100                           | >100   | 0    | 0    | 0    |
| 7     | >100          | >100 | 0    | 0    | 0    | >100                           | >100   | 0    | 0    | 0    |
| 8     | >100          | >100 | 0    | 0    | 0    | >100                           | >100   | 0    | 0    | 0    |
| 9     | >100          | >100 | 0    | 0    | 0    | >100                           | >100   | 0    | 0    | 0    |
| 10    | >100          | >100 | 0    | 0    | 0    | >100                           | >100   | 0    | 0    | 0    |
| 11    | >100          | >100 | 0    | 0    | 0    | >100                           | >100   | 0    | 0    | 0    |
| 12    | >100          | >100 | 0    | 0    | 0    | >100                           | >100   | 0    | 0    | 0    |
| 13    | >100          | >100 | 0    | 0    | 0    | >100                           | 13, 11 | 0    | 0    | 0    |
| 14    | >100          | >100 | 0    | 0    | 0    | >100                           | 0      | 0    | 0    | 0    |
| 15    | >100          | >100 | 0    | 0    | 0    | >100                           | 0      | 0    | 0    | 0    |
| 16    | >100          | >100 | 0    | 0    | 0    | >100                           | 0      | 0    | 0    | 0    |
| 17    | >100          | >100 | 0    | 0    | 0    | >100                           | 0      | 0    | 0    | 0    |
| 18    | >100          | >100 | 0    | 0    | 0    | >100                           | 0      | 0    | 0    | 0    |
| 19    | >100          | >100 | 0    | 0    | 0    | >100                           | 0      | 0    | 0    | 0    |
| 20    | >100          | >100 | 0    | 0    | 0    | >100                           | 0      | 0    | 0    | 0    |
| 21    | >100          | >100 | 0    | 0    | 0    | >100                           | 0      | 0    | 0    | 0    |
| 22    | >100          | >100 | 0    | 0    | 0    | >100                           | <1     | 0    | 0    | 0    |
| 23    | >100          | >100 | 0    | 0    | 0    | >100                           | 0      | 0    | 0    | 0    |
| 24    | >100          | >100 | 0    | 0    | 0    | >101                           | 0      | 0    | 0    | 0    |

**Supplementary Table 1B:** Average colony forming units (CFU) present at each hour for colistin only or 50 µg/ml CDP-B11 plus colistin in M9+Glucose media.

| µg/ml | Colistin only |      |      |      |      | 50 µg/ml CDP-B11 plus colistin |      |      |      |      |
|-------|---------------|------|------|------|------|--------------------------------|------|------|------|------|
|       | 0             | 1.25 | 2.5  | 5    | 10   | 0                              | 1.25 | 2.5  | 5    | 10   |
| 0     | >100          | >100 | >100 | >100 | >100 | >100                           | >100 | >100 | >100 | >100 |
| 1     | >100          | >100 | >100 | >100 | 3.3  | >100                           | >100 | >100 | >100 | 5.3  |
| 2     | >100          | >100 | 5.0  | 4.3  | 1.6  | >100                           | >100 | 6.9  | 3.4  | 2    |
| 3     | >100          | >100 | <1   | 0.0  | 0.0  | >100                           | 11   | 2.1  | <1   | <1   |
| 4     | >100          | >100 | <1   | 1.3  | 0    | >100                           | 1.6  | <1   | <1   | 0    |
| 5     | >100          | >100 | 3.8  | <1   | 0.0  | >100                           | 2.2  | 1    | <1   | <1   |
| 6     | >100          | >100 | <1   | <1   | <1   | >100                           | <1   | <1   | <1   | <1   |
| 7     | >100          | >100 | 1.0  | <1   | 0    | >100                           | <1   | <1   | <1   | 0    |
| 8     | >100          | >100 | <1   | <1   | 0    | >100                           | <1   | <1   | 0    | 0    |
| 12    | >100          | >100 | 0    | 0    | 0    | >100                           | 0    | 0    | 0    | 0    |
| 24    | >100          | >100 | 0    | 0    | 0    | >100                           | 0    | 0    | 0    | 0    |
